# Supplementary material for: The Neural Signature of Visual Learning Under Restrictive Virtual-Reality Conditions
Source: PubMed Central journal article supplement (PMC8888666; doi:10.3389/fnbeh.2022.846076), 2022-02-16
Supplement: Image_1.pdf [file Image_1.pdf]

## Supplementary Materials

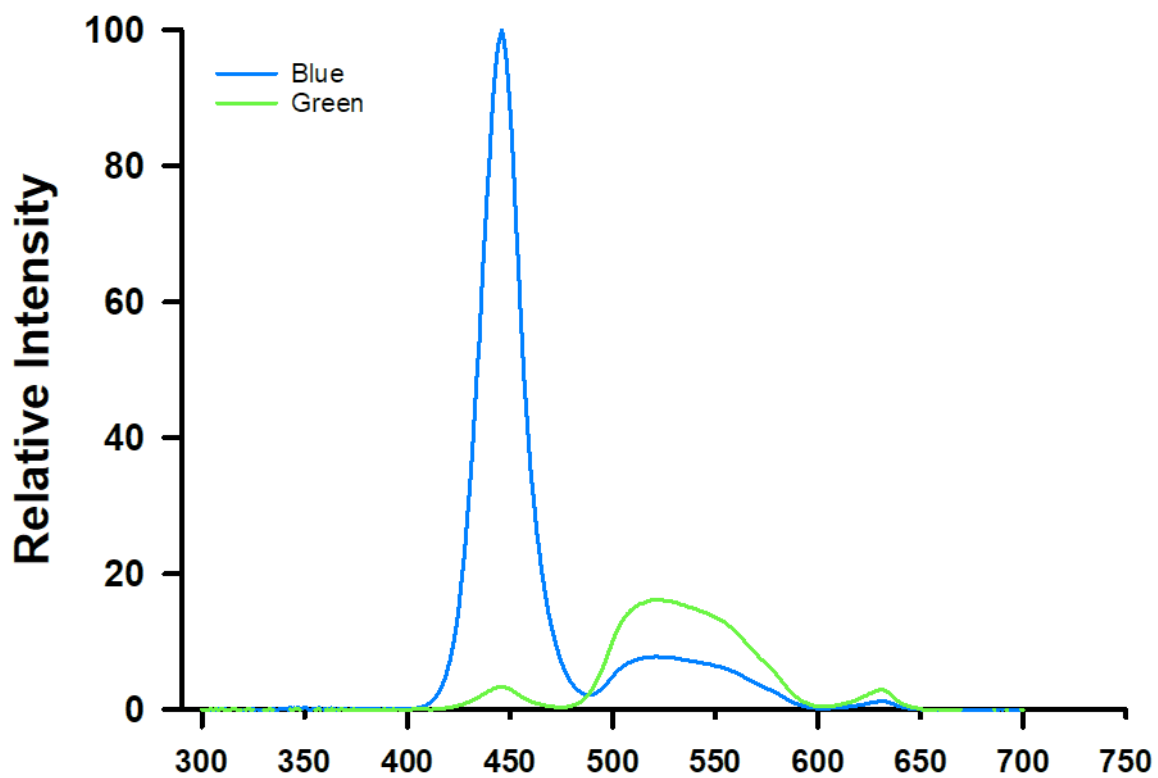

**Supplementary Figure 1.** Spectral distribution (relative intensity as a function of wavelength) of the blue light (dominant wavelength 446 nm) and the green light (dominant wavelength 528 nm) used to train the bees in the color discrimination task.

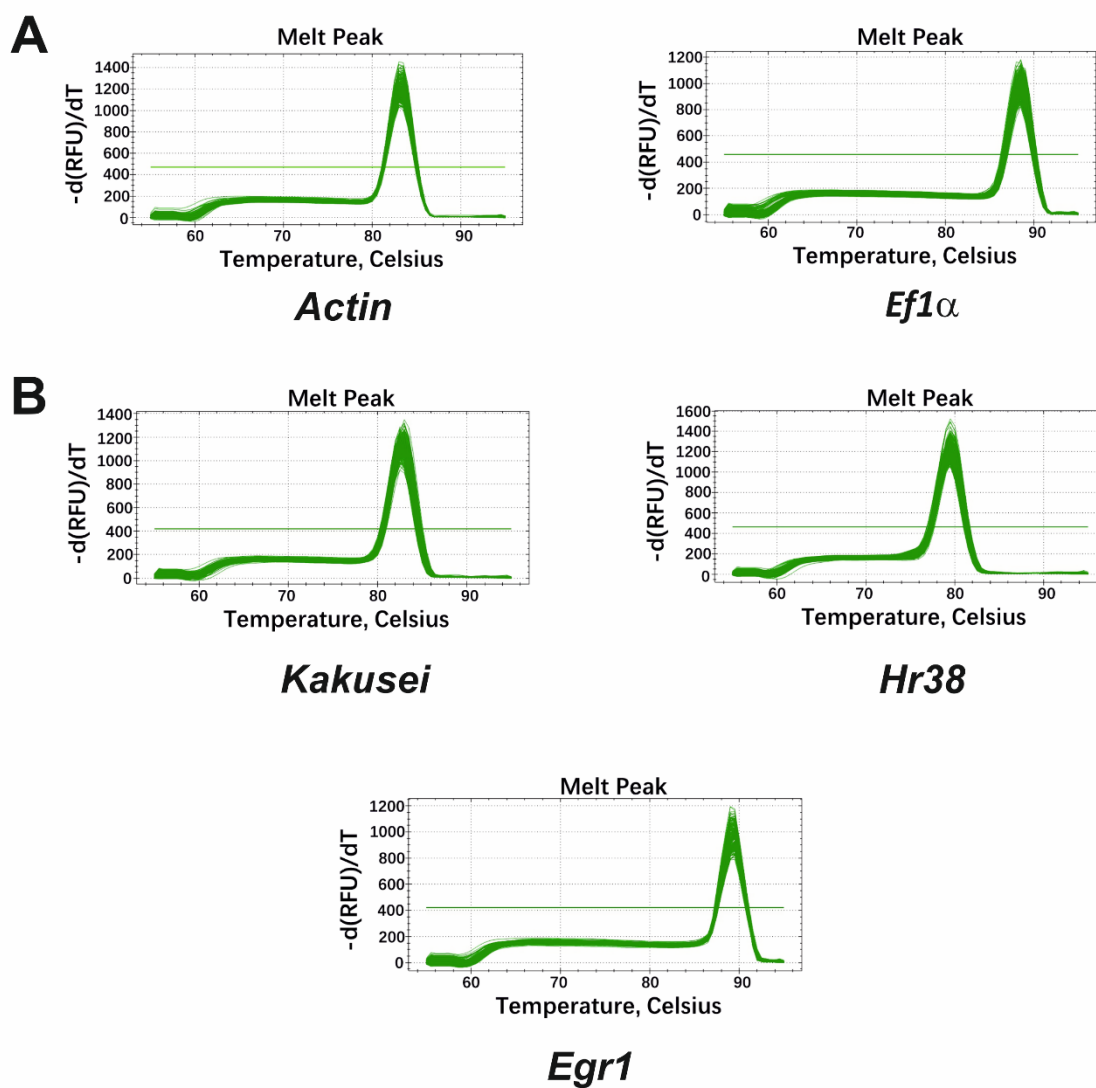

**Supplementary Figure 2. Validation selectivity of gene-specific primers. Melting peaks of RT-qPCR. A)** Reference genes. **B)** Target genes.

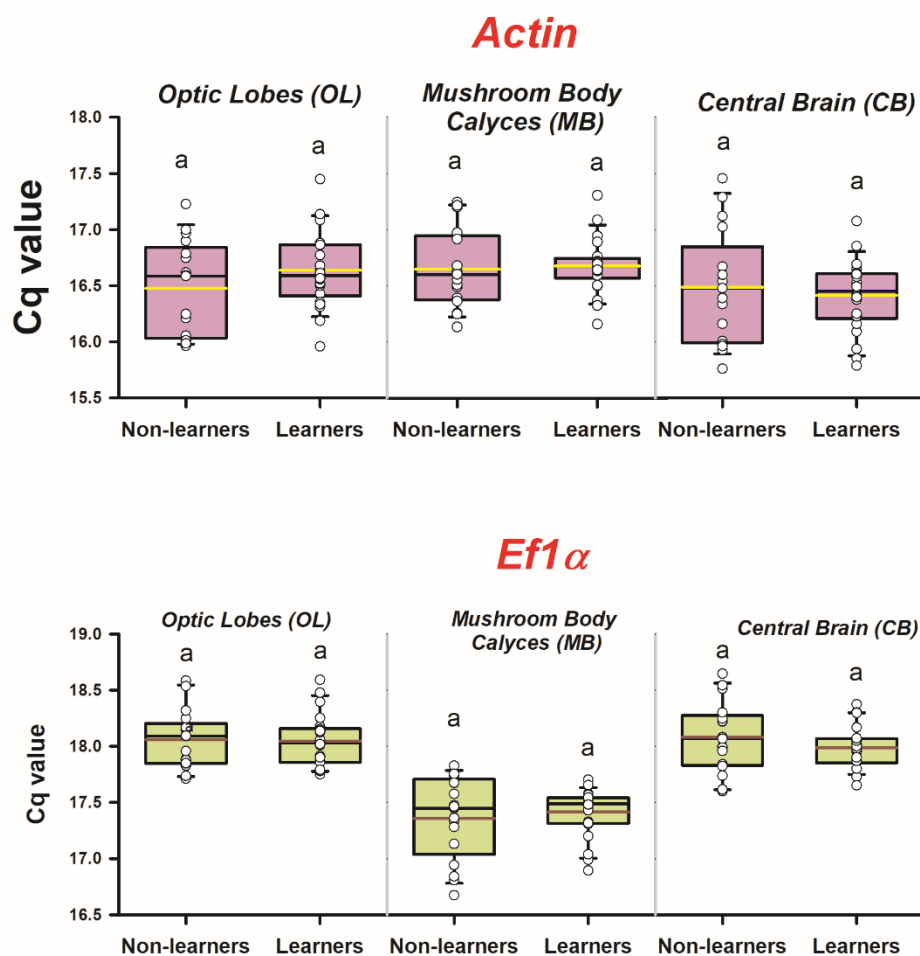

**Supplementary Figure 3. Expression levels (Cq values) of the reference genes *Actin* (upper row) and *Ef1 $\alpha$*  (lower row).** Expression levels in the brain regions considered (optic lobes, mushroom body calyces and central brain) of learners and non-learners (n=22 and n=17, respectively, for both genes). Box plots show the mean value in yellow (*Actin*) or red (*Ef1 $\alpha$* ). Sample sizes are indicated within parentheses below each group. Error bars define the 10<sup>th</sup> and 90<sup>th</sup> percentiles. Same letters on top of box plots indicate absence of significant differences (two-sample t test;  $p < 0.05$ ).
